# Supplementary material for: Gene Variation of Endoplasmic Reticulum Aminopeptidases 1 and 2, and Risk of Blood Pressure Progression and Incident Hypertension among 17,255 Initially Healthy Women
Source: Hindawi journal article supplement (doi:10.1155/2018/2308585), 2018-01-01
Supplement: f1 [file 2308585.f1.pdf]

# SUPPLEMENTAL MATERIAL

Online Supplementary Data Table 1: Linear regression analysis for all SNPs evaluated with baseline systolic blood pressure levels

| dbSNP        | MA | MAF    | Beta-estimate | SE      | t-Value | p-uncorrected |
|--------------|----|--------|---------------|---------|---------|---------------|
| <i>ERAP1</i> |    |        |               |         |         |               |
| rs1559085    | G  | 0.1413 | 0.02971       | 0.13886 | 0.21    | 0.8306        |
| rs27851      | G  | 0.0607 | 0.31814       | 0.20335 | 1.56    | 0.1177        |
| rs3756623    | C  | 0.0750 | 0.07390       | 0.18380 | 0.40    | 0.6877        |
| rs754615     | C  | 0.3907 | -0.05297      | 0.09947 | -0.53   | 0.5944        |
| rs1862609    | A  | 0.3129 | -0.09579      | 0.10434 | -0.92   | 0.3586        |
| rs27772      | G  | 0.3133 | -0.10841      | 0.10463 | -1.04   | 0.3001        |
| rs28081      | A  | 0.1510 | 0.08516       | 0.13473 | 0.63    | 0.5273        |
| rs27037      | A  | 0.2957 | 0.19972       | 0.10564 | 1.89    | 0.0587        |
| rs27429      | C  | 0.0598 | 0.32834       | 0.20469 | 1.60    | 0.1087        |
| rs27524      | A  | 0.3730 | 0.19677       | 0.10002 | 1.97    | 0.0492        |
| rs25862      | A  | 0.4488 | 0.00072       | 0.09761 | 0.01    | 0.9941        |
| rs11135480   | C  | 0.1321 | 0.16456       | 0.14237 | 1.16    | 0.2478        |
| rs10515247   | A  | 0.1323 | 0.15257       | 0.14235 | 1.07    | 0.2838        |
| rs149078     | A  | 0.2965 | -0.03113      | 0.10559 | -0.29   | 0.7681        |
| rs27042      | A  | 0.3655 | 0.06812       | 0.10044 | 0.68    | 0.4977        |
| rs27044      | G  | 0.2795 | 0.05808       | 0.10775 | 0.54    | 0.5899        |
| rs17482078   | A  | 0.2039 | -0.12010      | 0.11979 | -1.00   | 0.3161        |
| rs42398      | G  | 0.1470 | 0.01970       | 0.13619 | 0.14    | 0.8850        |
| rs469783     | G  | 0.4374 | 0.12081       | 0.09810 | 1.23    | 0.2181        |
| rs10050860   | A  | 0.2127 | -0.11031      | 0.11847 | -0.93   | 0.3518        |
| rs13154629   | A  | 0.2131 | -0.12626      | 0.11771 | -1.07   | 0.2834        |
| rs30187      | A  | 0.3478 | 0.11181       | 0.10165 | 1.10    | 0.2714        |
| rs27434      | A  | 0.2175 | 0.05464       | 0.11888 | 0.46    | 0.6458        |
| rs26618      | G  | 0.2370 | 0.01643       | 0.11399 | 0.14    | 0.8854        |
| rs25866      | A  | 0.2341 | 0.05658       | 0.11692 | 0.48    | 0.6285        |
| rs26653      | C  | 0.2835 | 0.10223       | 0.10743 | 0.95    | 0.3413        |
| rs34753      | G  | 0.2796 | 0.09403       | 0.10795 | 0.87    | 0.3837        |
| rs28129      | G  | 0.2804 | 0.10265       | 0.10786 | 0.95    | 0.3413        |
| rs18036      | G  | 0.2441 | 0.09210       | 0.11311 | 0.81    | 0.4155        |
| rs152280     | A  | 0.2085 | 0.03860       | 0.11923 | 0.32    | 0.7461        |
| rs12520537   | G  | 0.1537 | 0.10012       | 0.13468 | 0.74    | 0.4573        |
| rs41135      | G  | 0.4669 | -0.06933      | 0.09719 | -0.71   | 0.4756        |
| rs34736      | A  | 0.0648 | 0.22406       | 0.19710 | 1.14    | 0.2557        |
|              |    |        |               |         |         |               |
| <i>ERAP2</i> |    |        |               |         |         |               |
| rs2911132    | A  | 0.3726 | -0.06134      | 0.10034 | -0.61   | 0.5410        |
| rs2042381    | A  | 0.2733 | -0.01152      | 0.10842 | -0.11   | 0.9154        |
| rs2927615    | A  | 0.2404 | -0.16903      | 0.11295 | -1.50   | 0.1346        |
| rs2927612    | G  | 0.1168 | 0.21419       | 0.15033 | 1.42    | 0.1542        |
| rs2549778    | A  | 0.4292 | 0.08892       | 0.09765 | 0.91    | 0.3626        |
| rs6861666    | G  | 0.0781 | 0.13711       | 0.18020 | 0.76    | 0.4467        |
| rs3733904    | G  | 0.2117 | -0.31140      | 0.11921 | -2.61   | 0.0090        |
| rs2549779    | G  | 0.4880 | -0.13241      | 0.09735 | -1.36   | 0.1738        |
| rs4869315    | A  | 0.4241 | -0.24981      | 0.09804 | -2.55   | 0.0108        |
| rs2549782    | C  | 0.4093 | 0.20951       | 0.09767 | 2.15    | 0.0320        |
| rs17408150   | T  | 0.0560 | 0.08593       | 0.21187 | 0.41    | 0.6851        |
| rs7714122    | G  | 0.0648 | 0.07624       | 0.19807 | 0.38    | 0.7003        |

Adjusted for age, body-mass index, history of diabetes, history of hyperlipidemia, current smoking, exercise, alcohol use, education level, current hormone use.

SE=standard error.

Online Supplementary Data Table 2: Linear regression analysis for all SNPs evaluated with baseline diastolic blood pressure levels

| dbSNP        | MA | MAF    | Beta-estimate | SE      | t-Value | p-uncorrected |
|--------------|----|--------|---------------|---------|---------|---------------|
| <i>ERAP1</i> |    |        |               |         |         |               |
| rs1559085    | G  | 0.1413 | -0.05589      | 0.11584 | -0.48   | 0.6295        |
| rs27851      | G  | 0.0607 | 0.44767       | 0.16965 | 2.64    | 0.0083        |
| rs3756623    | C  | 0.0750 | 0.02906       | 0.15346 | 0.19    | 0.8498        |
| rs754615     | C  | 0.3907 | -0.00069      | 0.08300 | -0.01   | 0.9934        |
| rs1862609    | A  | 0.3129 | -0.01928      | 0.08706 | -0.22   | 0.8248        |
| rs27772      | G  | 0.3133 | -0.06726      | 0.08732 | -0.77   | 0.4411        |
| rs28081      | A  | 0.1510 | 0.07781       | 0.11238 | 0.69    | 0.4887        |
| rs27037      | A  | 0.2957 | 0.08035       | 0.08806 | 0.91    | 0.3616        |
| rs27429      | C  | 0.0598 | 0.44405       | 0.17080 | 2.60    | 0.0093        |
| rs27524      | A  | 0.3730 | 0.08188       | 0.08349 | 0.98    | 0.3267        |
| rs25862      | A  | 0.4488 | 0.09248       | 0.08143 | 1.14    | 0.2561        |
| rs11135480   | C  | 0.1321 | -0.02839      | 0.11882 | -0.24   | 0.8112        |
| rs10515247   | A  | 0.1323 | -0.03785      | 0.11877 | -0.32   | 0.7500        |
| rs149078     | A  | 0.2965 | -0.09694      | 0.08815 | -1.10   | 0.2715        |
| rs27042      | A  | 0.3655 | 0.09181       | 0.08386 | 1.09    | 0.2736        |
| rs27044      | G  | 0.2795 | -0.02894      | 0.08990 | -0.32   | 0.7475        |
| rs17482078   | A  | 0.2039 | -0.03560      | 0.09996 | -0.36   | 0.7217        |
| rs42398      | G  | 0.1470 | 0.02119       | 0.11360 | 0.19    | 0.8520        |
| rs469783     | G  | 0.4374 | 0.00445       | 0.08184 | 0.05    | 0.9566        |
| rs10050860   | A  | 0.2127 | -0.04753      | 0.09887 | -0.48   | 0.6307        |
| rs13154629   | A  | 0.2131 | -0.04100      | 0.09823 | -0.42   | 0.6764        |
| rs30187      | A  | 0.3478 | 0.02449       | 0.08479 | 0.29    | 0.7727        |
| rs27434      | A  | 0.2175 | 0.06346       | 0.09912 | 0.64    | 0.5220        |
| rs26618      | G  | 0.2370 | -0.07185      | 0.09509 | -0.76   | 0.4499        |
| rs25866      | A  | 0.2341 | 0.08557       | 0.09757 | 0.88    | 0.3805        |
| rs26653      | C  | 0.2835 | 0.14834       | 0.08963 | 1.66    | 0.0979        |
| rs34753      | G  | 0.2796 | 0.14765       | 0.09012 | 1.64    | 0.1014        |
| rs28129      | G  | 0.2804 | 0.15353       | 0.08999 | 1.71    | 0.0880        |
| rs18036      | G  | 0.2441 | -0.02800      | 0.09437 | -0.30   | 0.7667        |
| rs152280     | A  | 0.2085 | 0.04775       | 0.09951 | 0.48    | 0.6314        |
| rs12520537   | G  | 0.1537 | 0.08176       | 0.11238 | 0.73    | 0.4670        |
| rs41135      | G  | 0.4669 | -0.09209      | 0.08110 | -1.14   | 0.2562        |
| rs34736      | A  | 0.0648 | 0.39074       | 0.16446 | 2.38    | 0.0175        |
| <i>ERAP2</i> |    |        |               |         |         |               |
| rs2911132    | A  | 0.3726 | 0.01459       | 0.08372 | 0.17    | 0.8617        |
| rs2042381    | A  | 0.2733 | -0.06922      | 0.09042 | -0.77   | 0.4440        |
| rs2927615    | A  | 0.2404 | -0.08548      | 0.09427 | -0.91   | 0.3646        |
| rs2927612    | G  | 0.1168 | 0.03659       | 0.12543 | 0.29    | 0.7705        |
| rs2549778    | A  | 0.4292 | 0.05886       | 0.08151 | 0.72    | 0.4703        |
| rs6861666    | G  | 0.0781 | 0.07794       | 0.15049 | 0.52    | 0.6045        |
| rs3733904    | G  | 0.2117 | -0.08272      | 0.09947 | -0.83   | 0.4056        |
| rs2549779    | G  | 0.4880 | -0.07126      | 0.08121 | -0.88   | 0.3802        |
| rs4869315    | A  | 0.4241 | -0.08793      | 0.08181 | -1.07   | 0.2825        |
| rs2549782    | C  | 0.4093 | 0.08601       | 0.08154 | 1.05    | 0.2915        |
| rs17408150   | T  | 0.0560 | -0.17605      | 0.17683 | -1.00   | 0.3195        |
| rs7714122    | G  | 0.0648 | -0.17078      | 0.16523 | -1.03   | 0.3014        |

Adjusted for age, body-mass index, history of diabetes, history of hyperlipidemia, current smoking, exercise, alcohol use, education level, current hormone use.

SE=standard error.

Online Supplementary Data Table 3: Expression quantitative trait loci (eQTL) of SNPs associated with blood pressure progression and incident hypertension -- eQTL from mRNA expression of otherwise normal human cardiovascular tissues based on the \*GTEx Analysis Release V6p (dbGaP accession phs000424.v6.p1)

| Gene  | Gencode ID        | SNP        | <i>p</i>  | ES     | T     | SE    | Tissue                 |
|-------|-------------------|------------|-----------|--------|-------|-------|------------------------|
| ERAP1 | ENSG00000164307.8 | rs27524    | 0.0042    | -0.35  | -2.9  | 0.12  | Artery - Coronary      |
|       |                   | rs27851    | 0.043     | 0.39   | 2     | 0.19  | Artery - Coronary      |
|       |                   | rs27429    | 0.08      | -0.36  | -1.8  | 0.2   | Artery - Coronary      |
|       |                   | rs30187    | 0.00022   | -0.44  | -3.8  | 0.11  | Artery - Coronary      |
|       |                   | rs34736    | 0.1       | -0.32  | -1.7  | 0.19  | Artery - Coronary      |
|       |                   | rs27772    | 0.052     | -0.24  | -2    | 0.12  | Artery - Coronary      |
|       |                   | rs469783   | 0.0042    | -0.33  | -2.9  | 0.11  | Artery - Coronary      |
|       |                   | rs10050860 | 0.88      | -0.025 | -0.16 | 0.16  | Artery - Coronary      |
|       |                   | rs27524    | 0.00087   | -0.21  | -3.4  | 0.062 | Artery - Tibial        |
|       |                   | rs27851    | 0.0023    | 0.37   | 3.1   | 0.12  | Artery - Tibial        |
|       |                   | rs27429    | 0.0025    | -0.4   | -3.1  | 0.13  | Artery - Tibial        |
|       |                   | rs30187    | 0.000073  | -0.24  | -4    | 0.06  | Artery - Tibial        |
|       |                   | rs34736    | 0.00016   | -0.46  | -3.8  | 0.12  | Artery - Tibial        |
|       |                   | rs27772    | 1.40E-13  | -0.44  | -7.8  | 0.056 | Artery - Tibial        |
|       |                   | rs469783   | 1.30E-07  | -0.3   | -5.4  | 0.056 | Artery - Tibial        |
|       |                   | rs10050860 | 0.0000086 | 0.35   | 4.5   | 0.076 | Artery - Tibial        |
|       |                   | rs27524    | 0.000015  | -0.4   | -4.5  | 0.088 | Adrenal Gland          |
|       |                   | rs27851    | 0.13      | 0.25   | 1.5   | 0.17  | Adrenal Gland          |
|       |                   | rs27429    | 0.53      | -0.12  | -0.64 | 0.19  | Adrenal Gland          |
|       |                   | rs30187    | 0.00001   | -0.44  | -4.6  | 0.094 | Adrenal Gland          |
|       |                   | rs34736    | 0.23      | -0.22  | -1.2  | 0.19  | Adrenal Gland          |
|       |                   | rs27772    | 0.00028   | -0.33  | -3.8  | 0.088 | Adrenal Gland          |
|       |                   | rs469783   | 0.002     | -0.3   | -3.2  | 0.096 | Adrenal Gland          |
|       |                   | rs10050860 | 0.18      | 0.18   | 1.3   | 0.13  | Adrenal Gland          |
|       |                   | rs27524    | 2.90E-07  | -0.36  | -5.4  | 0.066 | Heart - Left Ventricle |
|       |                   | rs27851    | 0.66      | -0.06  | -0.44 | 0.14  | Heart - Left Ventricle |
|       |                   | rs27429    | 0.55      | 0.088  | 0.59  | 0.15  | Heart - Left Ventricle |
|       |                   | rs30187    | 2.20E-07  | -0.36  | -5.4  | 0.066 | Heart - Left Ventricle |
|       |                   | rs34736    | 0.58      | 0.085  | 0.55  | 0.15  | Heart - Left           |

|       |                    |           |          |        |       |       |                        |
|-------|--------------------|-----------|----------|--------|-------|-------|------------------------|
|       |                    |           |          |        |       |       | Ventricle              |
|       |                    | rs27772   | 0.18     | -0.1   | -1.4  | 0.075 | Heart - Left Ventricle |
|       |                    | rs469783  | 0.00075  | -0.24  | -3.4  | 0.069 | Heart - Left Ventricle |
|       |                    |           |          |        |       |       |                        |
| ERAP2 | ENSG00000164308.12 | rs3733904 | 0.000042 | -0.63  | -4.3  | 0.15  | Artery - Coronary      |
|       |                    | rs4869315 | 1.40E-15 | -0.85  | -9.6  | 0.089 | Artery - Coronary      |
|       |                    | rs2549782 | 2.10E-25 | -1.1   | -14   | 0.077 | Artery - Coronary      |
|       |                    | rs2927615 | 0.39     | -0.15  | -0.86 | 0.17  | Artery - Coronary      |
|       |                    | rs3733904 | 2.00E-08 | -0.62  | -5.8  | 0.11  | Artery - Tibial        |
|       |                    | rs4869315 | 1.60E-32 | -0.84  | -14   | 0.061 | Artery - Tibial        |
|       |                    | rs2549782 | 1.10E-72 | -1.1   | -26   | 0.042 | Artery - Tibial        |
|       |                    | rs2927615 | 0.64     | -0.045 | -0.46 | 0.097 | Artery - Tibial        |
|       |                    | rs3733904 | 0.0029   | -0.53  | -3    | 0.17  | Adrenal Gland          |
|       |                    | rs4869315 | 1.90E-12 | -0.9   | -8    | 0.11  | Adrenal Gland          |
|       |                    | rs2549782 | 5.80E-24 | -1.1   | -13   | 0.08  | Adrenal Gland          |
|       |                    | rs2927615 | 0.75     | 0.06   | 0.31  | 0.19  | Adrenal Gland          |
|       |                    | rs3733904 | 0.000021 | -0.49  | -4.4  | 0.11  | Heart - Left Ventricle |
|       |                    | rs4869315 | 6.60E-20 | -0.75  | -11   | 0.071 | Heart - Left Ventricle |
|       |                    | rs2549782 | 1.50E-44 | -0.99  | -20   | 0.049 | Heart - Left Ventricle |
|       |                    | rs2927615 | 0.51     | -0.085 | -0.66 | 0.13  | Heart - Left Ventricle |

SNP=single nucleotide polymorphism, ES=effect size, T=T-statistic, SE=standard error

\*GTEx Portal (<http://www.gtexportal.org/home/testyourown>)

Online Supplementary Data Table 4: Genotype-phenotype association of ERAP 1 and 2 gene variants with blood pressure as described in dbGaP

| dbSNP       | MA** | $\beta$ | p-value  |
|-------------|------|---------|----------|
| *rs34753    | C    | 0.0223  | 0.7123   |
| *rs28129    | G    | 0.0223  | 0.7123   |
| *rs18036    | C    | 0.0944  | 0.1530   |
| rs151823    | A    | 0.0656  | 0.5103   |
| *rs152280   | T    | 0.1158  | 0.0795   |
| rs34733     | T    | 0.4041  | 0.0003   |
| *rs12520537 | G    | 0.1415  | 0.0766   |
| *rs41135    | C    | 0.0456  | 0.4376   |
| rs152468    | T    | 0.0874  | 0.2677   |
| *rs34736    | T    | 0.4045  | 0.0003   |
| rs11748795  | T    | 0.0722  | 0.3993   |
| rs10476692  | C    | 0.0337  | 0.7802   |
| rs845028    | G    | 0.0823  | 0.2291   |
| rs7708451   | T    | 0.4595  | 0.000089 |
| *rs2911132  | A    | 0.0296  | 0.6065   |
| rs11750671  | C    | 0.0774  | 0.3701   |
| *rs2042381  | A    | 0.1055  | 0.0960   |
| *rs2927615  | A    | 0.1117  | 0.0873   |
| rs2927613   | A    | 0.1323  | 0.0239   |
| *rs2927612  | G    | 0.1335  | 0.1300   |
| rs2911134   | G    | 0.0667  | 0.2497   |
| rs2549778   | T    | 0.0636  | 0.2802   |
| rs4092590   | C    | 0.1182  | 0.1049   |
| rs6861666   | G    | 0.2711  | 0.0092   |

dbGaP=The database of Genotypes and Phenotypes ([www.ncbi.nlm.nih.gov/gap](http://www.ncbi.nlm.nih.gov/gap))

| $\beta$ |=absolute beta-estimate

\*dbSNPs were evaluated in the present study

\*\*MA=minor allele as defined by the Phenotype-Genotype Integrator in dbGaP

All values presented are direct extracts from the Phenotype-Genotype Integrator in dbGaP

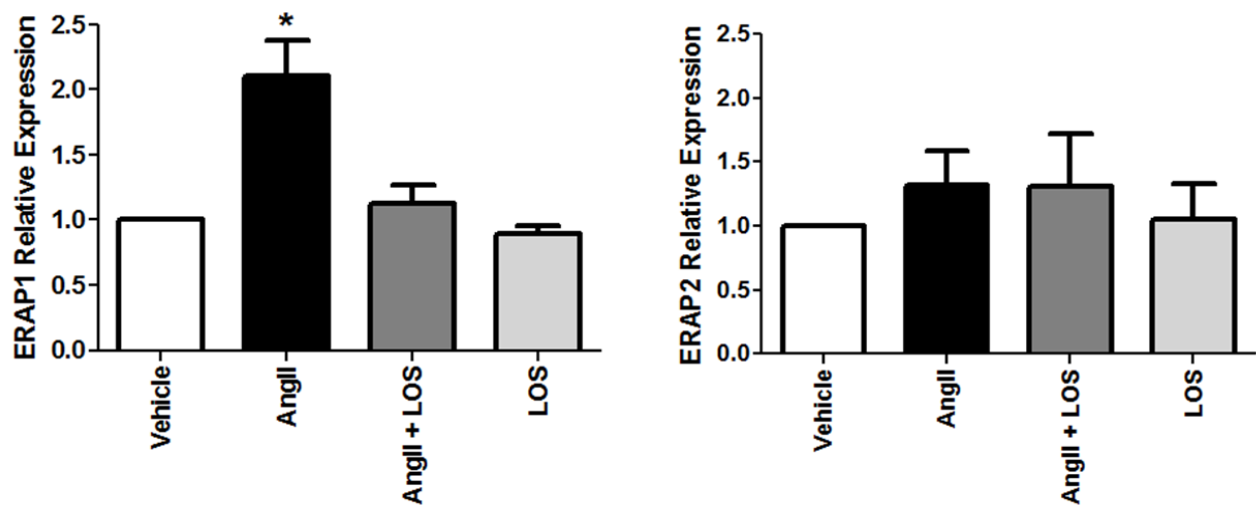

**Online Supplementary Fig 1.** Stimulation of EA.hy926 endothelial cells with AngII [10nM, 24h] leads to increases in ERAP1 but not ERAP2 gene expression. Increases in ERAP1 gene expression were blocked by Losartan [LOS, 1 $\mu$ M], an AngII type 1 receptor antagonist. Data show mean  $\pm$  SE. (\*P<0.05 vs. Vehicle or AngII + LOS, n=4 in triplicate determinations, ANOVA, Tukey's multiple comparison tests).
